# Supplementary material
Source: publisher figshare collection journal article supplement (https://acs.figshare.com/ndownloader/files/4765630)
Supplement: Supplementary file 1 [file 4765630]

  
data_shelxl 
  
_audit_creation_method            SHELXL-97 
_chemical_name_systematic 
; 
 ? 
; 
_chemical_name_common             ? 
_chemical_melting_point           ? 
_chemical_formula_moiety          'C18 H21 Br1.35 Cl0.65 N' 
_chemical_formula_sum 
 'C18 H21 Br1.35 Cl0.65 N' 
_chemical_formula_weight          382.28 
  
loop_ 
 _atom_type_symbol 
 _atom_type_description 
 _atom_type_scat_dispersion_real 
 _atom_type_scat_dispersion_imag 
 _atom_type_scat_source 
 'C'  'C'   0.0033   0.0016 
 'International Tables Vol C Tables 4.2.6.8 and 6.1.1.4' 
 'H'  'H'   0.0000   0.0000 
 'International Tables Vol C Tables 4.2.6.8 and 6.1.1.4' 
 'Br'  'Br'  -0.2901   2.4595 
 'International Tables Vol C Tables 4.2.6.8 and 6.1.1.4' 
 'Cl'  'Cl'   0.1484   0.1585 
 'International Tables Vol C Tables 4.2.6.8 and 6.1.1.4' 
 'N'  'N'   0.0061   0.0033 
 'International Tables Vol C Tables 4.2.6.8 and 6.1.1.4' 
  
_symmetry_cell_setting            monoclinic 
_symmetry_space_group_name_H-M    'P 1 21 1' 
  
loop_ 
 _symmetry_equiv_pos_as_xyz 
 'x, y, z' 
 '-x, y+1/2, -z' 
  
_cell_length_a                    8.5800(14) 
_cell_length_b                    6.9147(11) 
_cell_length_c                    14.765(3) 
_cell_angle_alpha                 90.00 
_cell_angle_beta                  90.373(5) 
_cell_angle_gamma                 90.00 
_cell_volume                      876.0(2) 
_cell_formula_units_Z             2 
_cell_measurement_temperature     113(2) 
_cell_measurement_reflns_used     2713 
_cell_measurement_theta_min       1.4 
_cell_measurement_theta_max       27.1 
  
_exptl_crystal_description        prism
_exptl_crystal_colour             colorless 
_exptl_crystal_size_max           0.10 
_exptl_crystal_size_mid           0.06 
_exptl_crystal_size_min           0.04 
_exptl_crystal_density_meas       ? 
_exptl_crystal_density_diffrn     1.449 
_exptl_crystal_density_method     'not measured' 
_exptl_crystal_F_000              389 
_exptl_absorpt_coefficient_mu     3.238 
_exptl_absorpt_correction_type    multi-scan 
_exptl_absorpt_correction_T_min   0.7378 
_exptl_absorpt_correction_T_max   0.8814 
_exptl_absorpt_process_details    'Jacobson, R. (1998) Private communication' 
  
_exptl_special_details 
; 
 ? 
; 
  
_diffrn_ambient_temperature       113(2) 
_diffrn_radiation_wavelength      0.71070 
_diffrn_radiation_type            MoK\a 
_diffrn_radiation_source          'rotating anode' 
_diffrn_radiation_monochromator   confocal 
_diffrn_measurement_device_type   'Rigaku Saturn' 
_diffrn_measurement_method        \w 
_diffrn_detector_area_resol_mean  7.31 
_diffrn_standards_number          ? 
_diffrn_standards_interval_count  ? 
_diffrn_standards_interval_time   ? 
_diffrn_standards_decay_%         ? 
_diffrn_reflns_number             8286 
_diffrn_reflns_av_R_equivalents   0.0333 
_diffrn_reflns_av_sigmaI/netI     0.0748 
_diffrn_reflns_limit_h_min        -10 
_diffrn_reflns_limit_h_max        10 
_diffrn_reflns_limit_k_min        -8 
_diffrn_reflns_limit_k_max        7 
_diffrn_reflns_limit_l_min        -18 
_diffrn_reflns_limit_l_max        18 
_diffrn_reflns_theta_min          1.38 
_diffrn_reflns_theta_max          27.10 
_reflns_number_total              3739 
_reflns_number_gt                 2457 
_reflns_threshold_expression      >2sigma(I) 
  
_computing_data_collection        'CrystalClear (Rigaku/MSC Inc., 2005)'
_computing_cell_refinement        'CrystalClear (Rigaku/MSC Inc., 2005)'
_computing_data_reduction         'CrystalClear (Rigaku/MSC Inc., 2005)'
_computing_structure_solution     'SHELXS-97 (Sheldrick, 1990)' 
_computing_structure_refinement   'SHELXL-97 (Sheldrick, 1997)' 
_computing_molecular_graphics     ? 
_computing_publication_material   'CrystalStructure 3.7.0' 
  
_refine_special_details 
; 
 Refinement of F^2^ against ALL reflections.  The weighted R-factor wR and 
 goodness of fit S are based on F^2^, conventional R-factors R are based 
 on F, with F set to zero for negative F^2^. The threshold expression of 
 F^2^ > 2sigma(F^2^) is used only for calculating R-factors(gt) etc. and is 
 not relevant to the choice of reflections for refinement.  R-factors based 
 on F^2^ are statistically about twice as large as those based on F, and R- 
 factors based on ALL data will be even larger. 
; 
  
_refine_ls_structure_factor_coef  Fsqd 
_refine_ls_matrix_type            full 
_refine_ls_weighting_scheme       calc 
_refine_ls_weighting_details 
 'calc w=1/[\s^2^(Fo^2^)+(0.0235P)^2^+0.0000P] where P=(Fo^2^+2Fc^2^)/3' 
_atom_sites_solution_primary      direct 
_atom_sites_solution_secondary    difmap 
_atom_sites_solution_hydrogens    geom 
_refine_ls_hydrogen_treatment     mixed 
_refine_ls_extinction_method      none 
_refine_ls_extinction_coef        ? 
_refine_ls_abs_structure_details 
 'Flack H D (1983), Acta Cryst. A39, 876-881' 
_refine_ls_abs_structure_Flack    -0.028(10) 
_refine_ls_number_reflns          3739 
_refine_ls_number_parameters      197 
_refine_ls_number_restraints      24 
_refine_ls_R_factor_all           0.0527 
_refine_ls_R_factor_gt            0.0330 
_refine_ls_wR_factor_ref          0.0646 
_refine_ls_wR_factor_gt           0.0603 
_refine_ls_goodness_of_fit_ref    0.861 
_refine_ls_restrained_S_all       0.906 
_refine_ls_shift/su_max           0.001 
_refine_ls_shift/su_mean          0.000 
  
loop_ 
 _atom_site_label 
 _atom_site_type_symbol 
 _atom_site_fract_x 
 _atom_site_fract_y 
 _atom_site_fract_z 
 _atom_site_U_iso_or_equiv 
 _atom_site_adp_type 
 _atom_site_occupancy 
 _atom_site_symmetry_multiplicity 
 _atom_site_calc_flag 
 _atom_site_refinement_flags 
 _atom_site_disorder_assembly 
 _atom_site_disorder_group 
Br1 Br -0.53732(4) 1.12316(6) 0.11730(2) 0.05656(15) Uani 1 1 d . . . 
Cl1 Cl 0.18456(8) 0.10429(11) 0.39633(4) 0.0591(3) Uani 0.652(2) 1 d P . . 
Br2 Br 0.18456(8) 0.10429(11) 0.39633(4) 0.0591(3) Uani 0.348(2) 1 d P . . 
N1 N 0.1995(3) 0.5382(5) 0.36210(18) 0.0369(8) Uani 1 1 d D A . 
C1 C 0.0838(3) 0.6349(7) 0.30040(17) 0.0310(7) Uani 1 1 d D . . 
H1A H 0.0981 0.7713 0.3095 0.037 Uiso 0.453(18) 1 d PR A 1 
H1B H 0.1015 0.7720 0.3001 0.037 Uiso 0.547(18) 1 d PR A 2 
C2 C -0.0850(3) 0.5895(6) 0.3291(2) 0.0353(9) Uani 1 1 d . A . 
H2A H -0.1082 0.4513 0.3178 0.042 Uiso 1 1 calc R . . 
H2B H -0.0972 0.6146 0.3947 0.042 Uiso 1 1 calc R . . 
C3 C -0.1974(4) 0.7148(5) 0.2757(2) 0.0329(9) Uani 1 1 d . . . 
C4 C -0.2060(4) 0.9116(5) 0.2955(2) 0.0403(9) Uani 1 1 d . A . 
H4A H -0.1408 0.9642 0.3416 0.048 Uiso 1 1 calc R . . 
C5 C -0.3084(4) 1.0321(5) 0.2490(2) 0.0422(10) Uani 1 1 d . . . 
H5A H -0.3160 1.1654 0.2640 0.051 Uiso 1 1 calc R A . 
C6 C -0.3986(4) 0.9546(6) 0.1809(2) 0.0387(9) Uani 1 1 d . A . 
C7 C -0.3917(4) 0.7640(5) 0.1585(2) 0.0390(9) Uani 1 1 d . . . 
H7A H -0.4548 0.7145 0.1108 0.047 Uiso 1 1 calc R A . 
C8 C -0.2902(3) 0.6408(7) 0.2065(2) 0.0368(8) Uani 1 1 d . A . 
H8A H -0.2852 0.5073 0.1916 0.044 Uiso 1 1 calc R . . 
C15 C 0.1865(3) 0.6023(8) 0.46035(18) 0.0429(8) Uani 1 1 d D . . 
H15A H 0.1253 0.5117 0.4942 0.051 Uiso 0.528(14) 1 d PR A 1 
H15B H 0.1376 0.7270 0.4630 0.051 Uiso 0.528(14) 1 d PR A 1 
H15C H 0.1067 0.5307 0.4910 0.051 Uiso 0.472(14) 1 d PR A 2 
H15D H 0.1638 0.7380 0.4639 0.051 Uiso 0.472(14) 1 d PR A 2 
C18 C 0.3667(3) 0.5695(6) 0.3333(2) 0.0455(11) Uani 1 1 d D . . 
H18A H 0.3837 0.6999 0.3133 0.055 Uiso 0.528(14) 1 d PR A 1 
H18B H 0.3944 0.4815 0.2857 0.055 Uiso 0.528(14) 1 d PR A 1 
H18C H 0.3728 0.6769 0.2922 0.055 Uiso 0.472(14) 1 d PR A 2 
H18D H 0.4055 0.4561 0.3034 0.055 Uiso 0.472(14) 1 d PR A 2 
C9 C 0.122(3) 0.602(3) 0.2011(7) 0.025(2) Uani 0.453(18) 1 d PGDU A 1 
C10 C 0.166(3) 0.750(2) 0.1430(10) 0.037(2) Uani 0.453(18) 1 d PG A 1 
H10A H 0.1801 0.8770 0.1657 0.045 Uiso 0.453(18) 1 calc PR A 1 
C11 C 0.189(3) 0.711(2) 0.0516(9) 0.054(3) Uani 0.453(18) 1 d PG A 1 
H11A H 0.2191 0.8127 0.0119 0.065 Uiso 0.453(18) 1 calc PR A 1 
C12 C 0.168(3) 0.525(2) 0.0184(6) 0.058(4) Uani 0.453(18) 1 d PG A 1 
H12A H 0.1839 0.4990 -0.0440 0.069 Uiso 0.453(18) 1 calc PR A 1 
C13 C 0.124(3) 0.3770(19) 0.0765(9) 0.051(3) Uani 0.453(18) 1 d PG A 1 
H13A H 0.1097 0.2497 0.0538 0.061 Uiso 0.453(18) 1 calc PR A 1 
C14 C 0.101(3) 0.415(2) 0.1678(8) 0.036(2) Uani 0.453(18) 1 d PG A 1 
H14A H 0.0707 0.3140 0.2075 0.043 Uiso 0.453(18) 1 calc PR A 1 
C16 C 0.3556(9) 0.627(3) 0.4946(5) 0.074(4) Uani 0.528(14) 1 d PD A 1 
H16A H 0.3708 0.5612 0.5536 0.088 Uiso 0.528(14) 1 calc PR A 1 
H16B H 0.3824 0.7652 0.5014 0.088 Uiso 0.528(14) 1 calc PR A 1 
C17 C 0.4563(9) 0.530(2) 0.4198(5) 0.057(3) Uani 0.528(14) 1 d PD A 1 
H17A H 0.5615 0.5886 0.4176 0.068 Uiso 0.528(14) 1 calc PR A 1 
H17B H 0.4667 0.3894 0.4305 0.068 Uiso 0.528(14) 1 calc PR A 1 
C9' C 0.103(2) 0.557(2) 0.2048(6) 0.025(2) Uani 0.547(18) 1 d PGD A 2 
C10' C 0.151(3) 0.6914(19) 0.1407(8) 0.037(2) Uani 0.547(18) 1 d PG A 2 
H10B H 0.1668 0.8224 0.1576 0.045 Uiso 0.547(18) 1 calc PR A 2 
C11' C 0.175(3) 0.634(2) 0.0516(7) 0.054(3) Uani 0.547(18) 1 d PG A 2 
H11B H 0.2076 0.7257 0.0078 0.065 Uiso 0.547(18) 1 calc PR A 2 
C12' C 0.152(2) 0.442(2) 0.0268(6) 0.058(4) Uani 0.547(18) 1 d PG A 2 
H12B H 0.1684 0.4028 -0.0340 0.069 Uiso 0.547(18) 1 calc PR A 2 
C13' C 0.104(2) 0.3078(19) 0.0910(8) 0.051(3) Uani 0.547(18) 1 d PG A 2 
H13B H 0.0884 0.1767 0.0740 0.061 Uiso 0.547(18) 1 calc PR A 2 
C14' C 0.080(3) 0.3652(19) 0.1800(7) 0.036(2) Uani 0.547(18) 1 d PG A 2 
H14B H 0.0476 0.2735 0.2239 0.043 Uiso 0.547(18) 1 calc PR A 2 
C16' C 0.3524(10) 0.562(3) 0.4967(5) 0.074(4) Uani 0.472(14) 1 d PD A 2 
H16C H 0.3675 0.4223 0.5092 0.088 Uiso 0.472(14) 1 calc PR A 2 
H16D H 0.3737 0.6363 0.5527 0.088 Uiso 0.472(14) 1 calc PR A 2 
C17' C 0.4582(10) 0.631(2) 0.4175(6) 0.057(3) Uani 0.472(14) 1 d PD A 2 
H17C H 0.4731 0.7727 0.4191 0.068 Uiso 0.472(14) 1 calc PR A 2 
H17D H 0.5614 0.5668 0.4199 0.068 Uiso 0.472(14) 1 calc PR A 2 
H1 H 0.175(3) 0.389(5) 0.364(2) 0.046(10) Uiso 1 1 d . . . 
  
loop_ 
 _atom_site_aniso_label 
 _atom_site_aniso_U_11 
 _atom_site_aniso_U_22 
 _atom_site_aniso_U_33 
 _atom_site_aniso_U_23 
 _atom_site_aniso_U_13 
 _atom_site_aniso_U_12 
Br1 0.0441(2) 0.0727(3) 0.0528(2) 0.0160(3) -0.00612(17) 0.0151(3) 
Cl1 0.0757(5) 0.0395(4) 0.0620(5) 0.0064(4) -0.0177(3) -0.0055(5) 
Br2 0.0757(5) 0.0395(4) 0.0620(5) 0.0064(4) -0.0177(3) -0.0055(5) 
N1 0.0279(16) 0.056(2) 0.0265(17) 0.0042(14) 0.0026(14) 0.0050(13) 
C1 0.0277(15) 0.0398(19) 0.0255(16) -0.001(2) 0.0014(13) 0.014(2) 
C2 0.0264(16) 0.047(2) 0.0330(18) 0.004(2) 0.0046(14) 0.0056(19) 
C3 0.0274(19) 0.047(2) 0.025(2) 0.0057(16) 0.0086(16) 0.0038(16) 
C4 0.038(2) 0.056(2) 0.027(2) -0.0024(18) 0.0030(18) 0.0113(19) 
C5 0.041(2) 0.047(2) 0.039(2) -0.0015(18) 0.001(2) 0.0105(17) 
C6 0.028(2) 0.056(2) 0.032(2) 0.0117(19) 0.0007(17) 0.0153(19) 
C7 0.028(2) 0.062(3) 0.028(2) 0.0007(18) -0.0002(17) -0.0002(18) 
C8 0.0256(16) 0.049(2) 0.0362(18) 0.006(2) 0.0065(14) 0.002(2) 
C15 0.0451(19) 0.056(2) 0.0277(17) 0.003(2) 0.0011(15) 0.005(3) 
C18 0.0216(17) 0.073(3) 0.041(2) 0.0059(19) 0.0083(16) 0.0004(18) 
C9 0.012(4) 0.034(6) 0.0293(19) 0.006(3) 0.0016(16) -0.006(4) 
C10 0.022(4) 0.057(7) 0.032(2) 0.001(4) 0.002(2) -0.010(5) 
C11 0.032(4) 0.102(9) 0.030(3) 0.006(5) 0.007(2) -0.001(9) 
C12 0.041(5) 0.101(12) 0.030(3) -0.019(5) -0.005(3) 0.025(8) 
C13 0.041(5) 0.067(7) 0.045(5) -0.010(5) -0.016(4) 0.018(6) 
C14 0.027(5) 0.045(6) 0.034(3) 0.006(3) -0.006(3) 0.004(5) 
C16 0.042(2) 0.133(11) 0.046(2) -0.003(5) -0.008(2) -0.026(5) 
C17 0.040(2) 0.092(9) 0.039(2) 0.036(5) -0.010(2) -0.027(5) 
C9' 0.012(4) 0.034(6) 0.0293(19) 0.006(3) 0.0016(16) -0.006(4) 
C10' 0.022(4) 0.057(7) 0.032(2) 0.001(4) 0.002(2) -0.010(5) 
C11' 0.032(4) 0.102(9) 0.030(3) 0.006(5) 0.007(2) -0.001(9) 
C12' 0.041(5) 0.101(12) 0.030(3) -0.019(5) -0.005(3) 0.025(8) 
C13' 0.041(5) 0.067(7) 0.045(5) -0.010(5) -0.016(4) 0.018(6) 
C14' 0.027(5) 0.045(6) 0.034(3) 0.006(3) -0.006(3) 0.004(5) 
C16' 0.042(2) 0.133(11) 0.046(2) -0.003(5) -0.008(2) -0.026(5) 
C17' 0.040(2) 0.092(9) 0.039(2) 0.036(5) -0.010(2) -0.027(5) 
  
_geom_special_details 
; 
 All esds (except the esd in the dihedral angle between two l.s. planes) 
 are estimated using the full covariance matrix.  The cell esds are taken 
 into account individually in the estimation of esds in distances, angles 
 and torsion angles; correlations between esds in cell parameters are only 
 used when they are defined by crystal symmetry.  An approximate (isotropic) 
 treatment of cell esds is used for estimating esds involving l.s. planes. 
; 
  
loop_ 
 _geom_bond_atom_site_label_1 
 _geom_bond_atom_site_label_2 
 _geom_bond_distance 
 _geom_bond_site_symmetry_2 
 _geom_bond_publ_flag 
Br1 C6 1.908(3) . ? 
N1 C1 1.501(4) . ? 
N1 C18 1.514(4) . ? 
N1 C15 1.522(4) . ? 
C1 C9' 1.521(7) . ? 
C1 C9 1.522(8) . ? 
C1 C2 1.544(4) . ? 
C2 C3 1.514(4) . ? 
C3 C8 1.390(4) . ? 
C3 C4 1.394(4) . ? 
C4 C5 1.390(4) . ? 
C5 C6 1.374(4) . ? 
C6 C7 1.360(5) . ? 
C7 C8 1.406(5) . ? 
C15 C16 1.542(8) . ? 
C15 C16' 1.544(9) . ? 
C18 C17 1.511(7) . ? 
C18 C17' 1.526(8) . ? 
C9 C10 1.3900 . ? 
C9 C14 1.3900 . ? 
C10 C11 1.3900 . ? 
C11 C12 1.3900 . ? 
C12 C13 1.3900 . ? 
C13 C14 1.3900 . ? 
C16 C17 1.557(9) . ? 
C9' C10' 1.3900 . ? 
C9' C14' 1.3900 . ? 
C10' C11' 1.3900 . ? 
C11' C12' 1.3900 . ? 
C12' C13' 1.3900 . ? 
C13' C14' 1.3900 . ? 
C16' C17' 1.561(10) . ? 
  
loop_ 
 _geom_angle_atom_site_label_1 
 _geom_angle_atom_site_label_2 
 _geom_angle_atom_site_label_3 
 _geom_angle 
 _geom_angle_site_symmetry_1 
 _geom_angle_site_symmetry_3 
 _geom_angle_publ_flag 
C1 N1 C18 112.9(2) . . ? 
C1 N1 C15 113.4(2) . . ? 
C18 N1 C15 107.6(2) . . ? 
N1 C1 C9' 109.2(8) . . ? 
N1 C1 C9 111.9(10) . . ? 
C9' C1 C9 13.2(10) . . ? 
N1 C1 C2 111.2(3) . . ? 
C9' C1 C2 107.0(8) . . ? 
C9 C1 C2 116.2(9) . . ? 
C3 C2 C1 109.6(3) . . ? 
C8 C3 C4 118.9(3) . . ? 
C8 C3 C2 122.1(4) . . ? 
C4 C3 C2 119.0(3) . . ? 
C5 C4 C3 121.1(3) . . ? 
C6 C5 C4 118.6(3) . . ? 
C7 C6 C5 122.1(3) . . ? 
C7 C6 Br1 120.0(3) . . ? 
C5 C6 Br1 117.9(3) . . ? 
C6 C7 C8 119.5(3) . . ? 
C3 C8 C7 119.8(4) . . ? 
N1 C15 C16 105.6(4) . . ? 
N1 C15 C16' 101.9(5) . . ? 
C16 C15 C16' 16.8(14) . . ? 
C17 C18 N1 102.4(4) . . ? 
C17 C18 C17' 26.5(6) . . ? 
N1 C18 C17' 107.1(4) . . ? 
C10 C9 C14 120.0 . . ? 
C10 C9 C1 122.9(10) . . ? 
C14 C9 C1 116.9(10) . . ? 
C11 C10 C9 120.0 . . ? 
C10 C11 C12 120.0 . . ? 
C13 C12 C11 120.0 . . ? 
C14 C13 C12 120.0 . . ? 
C13 C14 C9 120.0 . . ? 
C15 C16 C17 104.2(7) . . ? 
C18 C17 C16 103.9(6) . . ? 
C10' C9' C14' 120.0 . . ? 
C10' C9' C1 115.5(8) . . ? 
C14' C9' C1 124.5(8) . . ? 
C11' C10' C9' 120.0 . . ? 
C10' C11' C12' 120.0 . . ? 
C11' C12' C13' 120.0 . . ? 
C14' C13' C12' 120.0 . . ? 
C13' C14' C9' 120.0 . . ? 
C15 C16' C17' 102.9(7) . . ? 
C18 C17' C16' 103.1(7) . . ? 
  
loop_ 
 _geom_torsion_atom_site_label_1 
 _geom_torsion_atom_site_label_2 
 _geom_torsion_atom_site_label_3 
 _geom_torsion_atom_site_label_4 
 _geom_torsion 
 _geom_torsion_site_symmetry_1 
 _geom_torsion_site_symmetry_2 
 _geom_torsion_site_symmetry_3 
 _geom_torsion_site_symmetry_4 
 _geom_torsion_publ_flag 
C18 N1 C1 C9' 58.9(7) . . . . ? 
C15 N1 C1 C9' -178.4(7) . . . . ? 
C18 N1 C1 C9 45.1(8) . . . . ? 
C15 N1 C1 C9 167.8(8) . . . . ? 
C18 N1 C1 C2 176.7(3) . . . . ? 
C15 N1 C1 C2 -60.6(4) . . . . ? 
N1 C1 C2 C3 170.6(3) . . . . ? 
C9' C1 C2 C3 -70.2(8) . . . . ? 
C9 C1 C2 C3 -60.0(10) . . . . ? 
C1 C2 C3 C8 106.6(4) . . . . ? 
C1 C2 C3 C4 -72.2(4) . . . . ? 
C8 C3 C4 C5 1.8(5) . . . . ? 
C2 C3 C4 C5 -179.4(3) . . . . ? 
C3 C4 C5 C6 -1.8(5) . . . . ? 
C4 C5 C6 C7 0.7(5) . . . . ? 
C4 C5 C6 Br1 -179.6(3) . . . . ? 
C5 C6 C7 C8 0.4(5) . . . . ? 
Br1 C6 C7 C8 -179.3(2) . . . . ? 
C4 C3 C8 C7 -0.6(5) . . . . ? 
C2 C3 C8 C7 -179.4(3) . . . . ? 
C6 C7 C8 C3 -0.5(5) . . . . ? 
C1 N1 C15 C16 -138.3(9) . . . . ? 
C18 N1 C15 C16 -12.7(9) . . . . ? 
C1 N1 C15 C16' -155.2(9) . . . . ? 
C18 N1 C15 C16' -29.6(9) . . . . ? 
C1 N1 C18 C17 159.2(6) . . . . ? 
C15 N1 C18 C17 33.4(7) . . . . ? 
C1 N1 C18 C17' 132.2(7) . . . . ? 
C15 N1 C18 C17' 6.3(8) . . . . ? 
N1 C1 C9 C10 -114.2(14) . . . . ? 
C9' C1 C9 C10 165(9) . . . . ? 
C2 C1 C9 C10 116.8(14) . . . . ? 
N1 C1 C9 C14 69.9(14) . . . . ? 
C9' C1 C9 C14 -11(7) . . . . ? 
C2 C1 C9 C14 -59.1(15) . . . . ? 
C14 C9 C10 C11 0.0 . . . . ? 
C1 C9 C10 C11 -176(2) . . . . ? 
C9 C10 C11 C12 0.0 . . . . ? 
C10 C11 C12 C13 0.0 . . . . ? 
C11 C12 C13 C14 0.0 . . . . ? 
C12 C13 C14 C9 0.0 . . . . ? 
C10 C9 C14 C13 0.0 . . . . ? 
C1 C9 C14 C13 176.0(19) . . . . ? 
N1 C15 C16 C17 -12.4(14) . . . . ? 
C16' C15 C16 C17 66.8(19) . . . . ? 
N1 C18 C17 C16 -40.5(12) . . . . ? 
C17' C18 C17 C16 63.0(13) . . . . ? 
C15 C16 C17 C18 33.1(16) . . . . ? 
N1 C1 C9' C10' -116.1(10) . . . . ? 
C9 C1 C9' C10' -12(7) . . . . ? 
C2 C1 C9' C10' 123.6(10) . . . . ? 
N1 C1 C9' C14' 62.6(13) . . . . ? 
C9 C1 C9' C14' 167(9) . . . . ? 
C2 C1 C9' C14' -57.7(13) . . . . ? 
C14' C9' C10' C11' 0.0 . . . . ? 
C1 C9' C10' C11' 178.8(15) . . . . ? 
C9' C10' C11' C12' 0.0 . . . . ? 
C10' C11' C12' C13' 0.0 . . . . ? 
C11' C12' C13' C14' 0.0 . . . . ? 
C12' C13' C14' C9' 0.0 . . . . ? 
C10' C9' C14' C13' 0.0 . . . . ? 
C1 C9' C14' C13' -178.6(17) . . . . ? 
N1 C15 C16' C17' 41.1(15) . . . . ? 
C16 C15 C16' C17' -63.7(18) . . . . ? 
C17 C18 C17' C16' -64.0(12) . . . . ? 
N1 C18 C17' C16' 19.4(14) . . . . ? 
C15 C16' C17' C18 -37.6(17) . . . . ? 
  
loop_ 
 _geom_hbond_atom_site_label_D 
 _geom_hbond_atom_site_label_H 
 _geom_hbond_atom_site_label_A 
 _geom_hbond_distance_DH 
 _geom_hbond_distance_HA 
 _geom_hbond_distance_DA 
 _geom_hbond_angle_DHA 
 _geom_hbond_site_symmetry_A 
N1 H1 Cl1  1.05(3) 2.03(3) 3.045(3) 161(3) . 
N1 H1 Br2  1.05(3) 2.03(3) 3.045(3) 161(3) . 
  
_diffrn_measured_fraction_theta_max    0.997 
_diffrn_reflns_theta_full              27.10 
_diffrn_measured_fraction_theta_full   0.997 
_refine_diff_density_max    0.459 
_refine_diff_density_min   -0.421 
_refine_diff_density_rms    0.053 
